# Supplementary material
Source: PubMed Central journal article supplement (PMC6065033)
Supplement: pnas.1800525115.sapp.pdf [file pnas.1800525115.sapp.pdf]

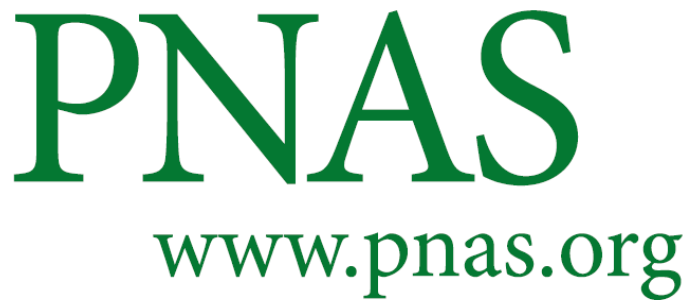

Supplementary Information for

**Rhinovirus induces an anabolic reprogramming in host cell metabolism essential for viral replication**

**Guido A. Gualdoni, Katharina A. Mayer, Anna-Maria Kapsch, Katharina Kreuzberg, Alexander Puck, Philip Kienzl, Felicitas Oberndorfer, Karin Frühwirth, Stefan Winkler, Dieter Blaas, Gerhard J. Zlabinger, Johannes Stöckl**

Corresponding author: Guido A. Gualdoni  
Email: [guido.gualdoni@meduniwien.ac.at](mailto:guido.gualdoni@meduniwien.ac.at)

**This PDF file includes:**

Figs. S1 to S7  
Tables S1

**Other supplementary materials for this manuscript include the following:**

Datasets S1

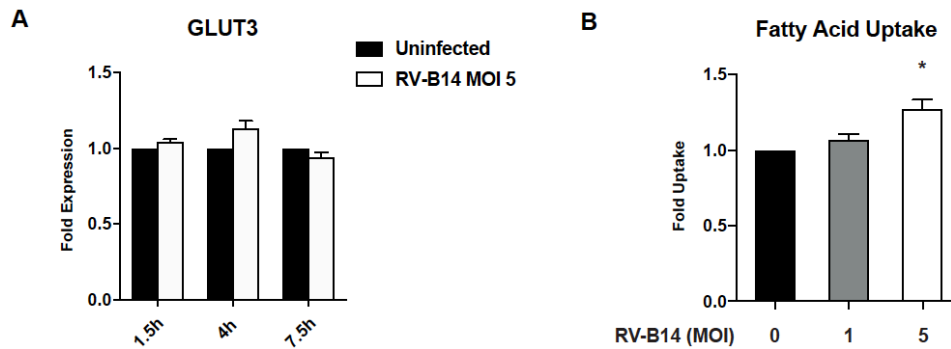

**Fig. S1. Impact of RV on GLUT3 expression and fatty acid uptake.** Panel A) shows the mean  $\pm$  SEM of GLUT3 expression in the 4 experiments in fibroblasts. Panel B) shows the uptake of fluorescently labeled fatty acids (C16-Bodipy®) in RV infected HeLa cells. Mean  $\pm$  SEM of the 4 experiments is depicted. \* $p < 0.05$  calculated by paired t-test of the raw MFI data.

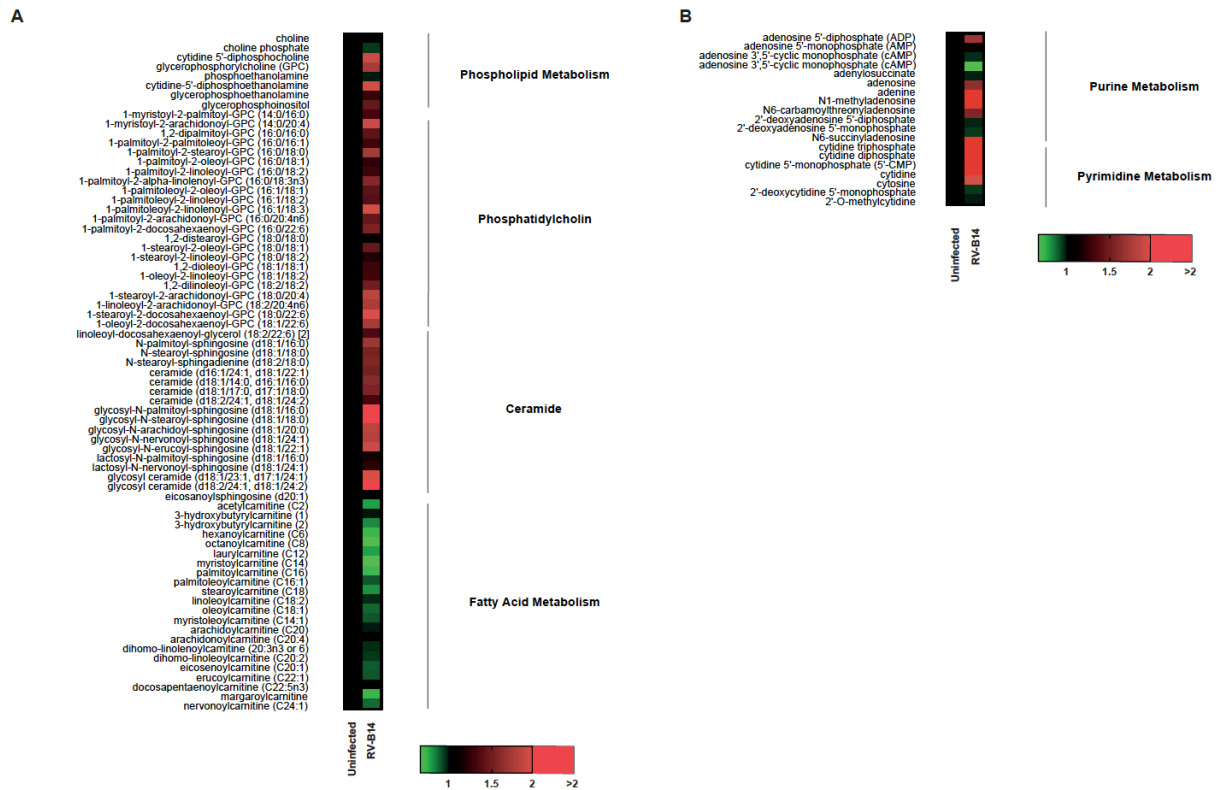

**Fig. S2. Rhinovirus induces an anabolic reprogramming of host cell metabolism.** Metabolomic analysis of HeLa cells infected with RV-B14 (MOI 3.5) at 7 h post infection. Panel A) shows the effect on lipid metabolism and Panel B) on nucleotide metabolism.

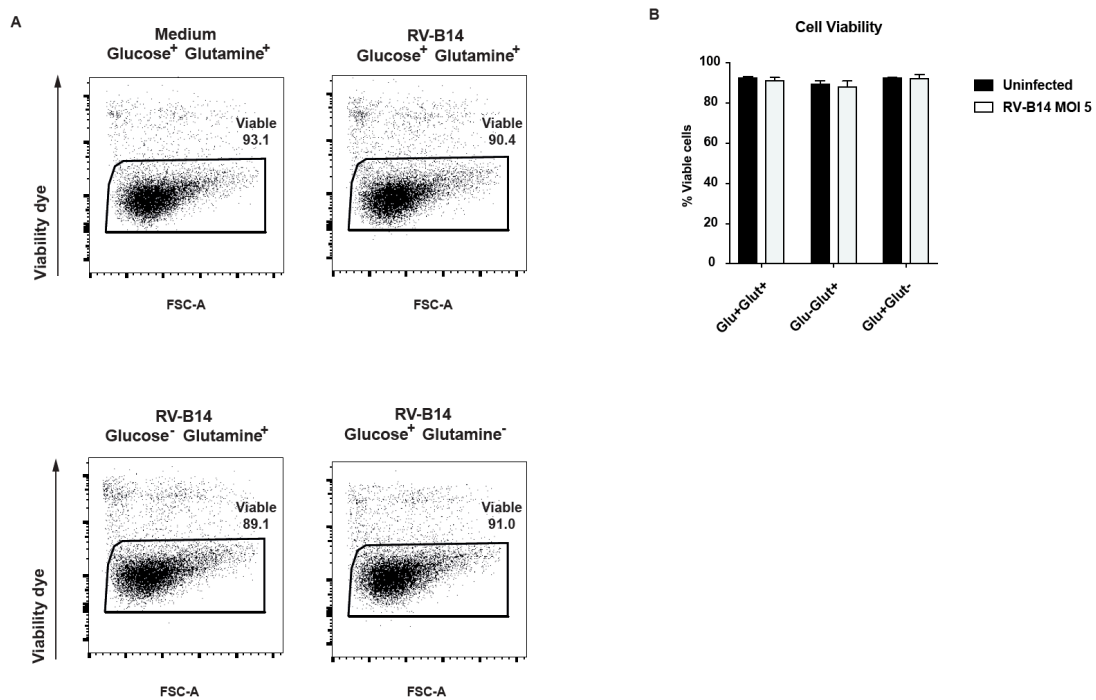

**Fig. S3. Viability of glucose or glutamine-deprived HeLa cells.** Cells were infected as described in the materials and methods section. Panel A) shows a representative 7-AAD staining. Panel B) shows a summary of 2 experiments.  $\pm$ SD.

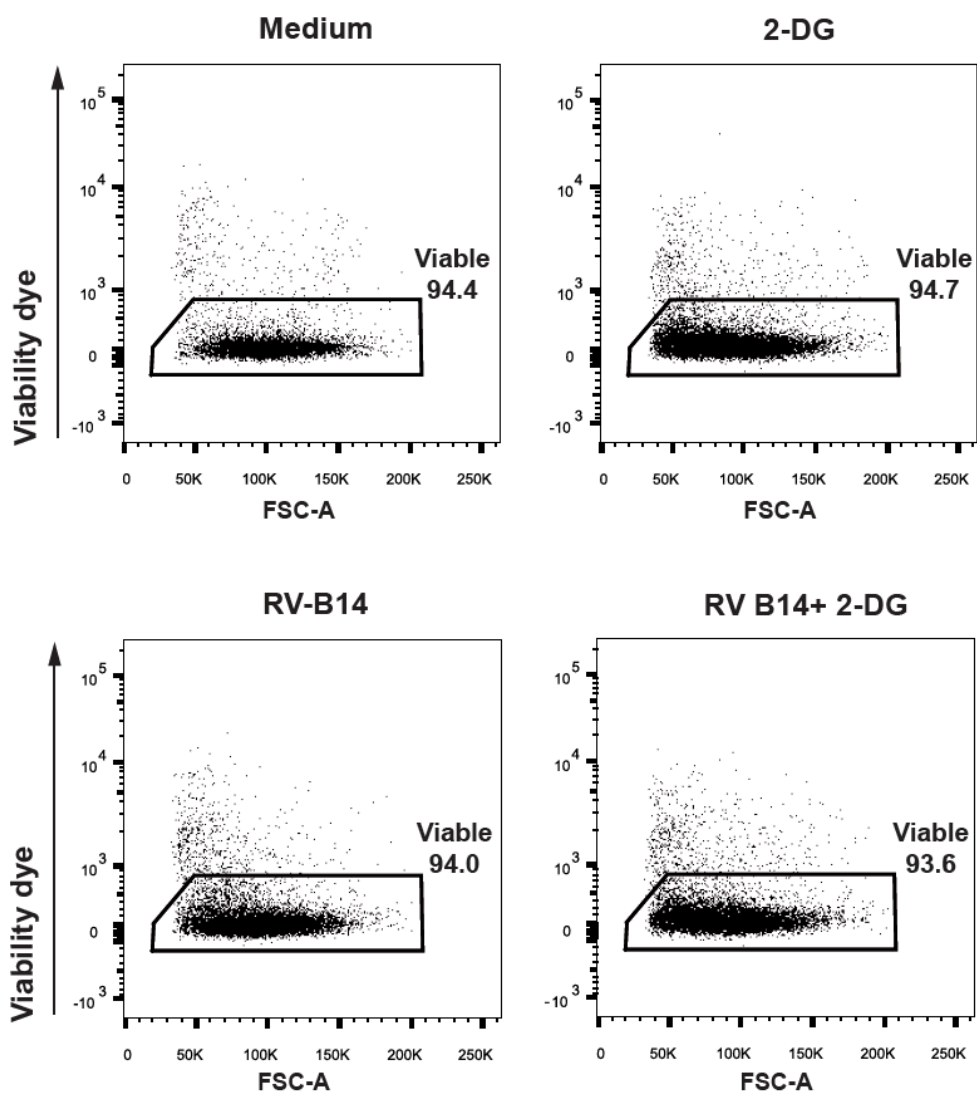

**Fig. S4. Viability of 2-DG treated HeLa cells.** Cells were infected as described in the materials and methods section. Panel A) shows a representative fixable viability dye staining. A representative of 2 similar experiments is shown.

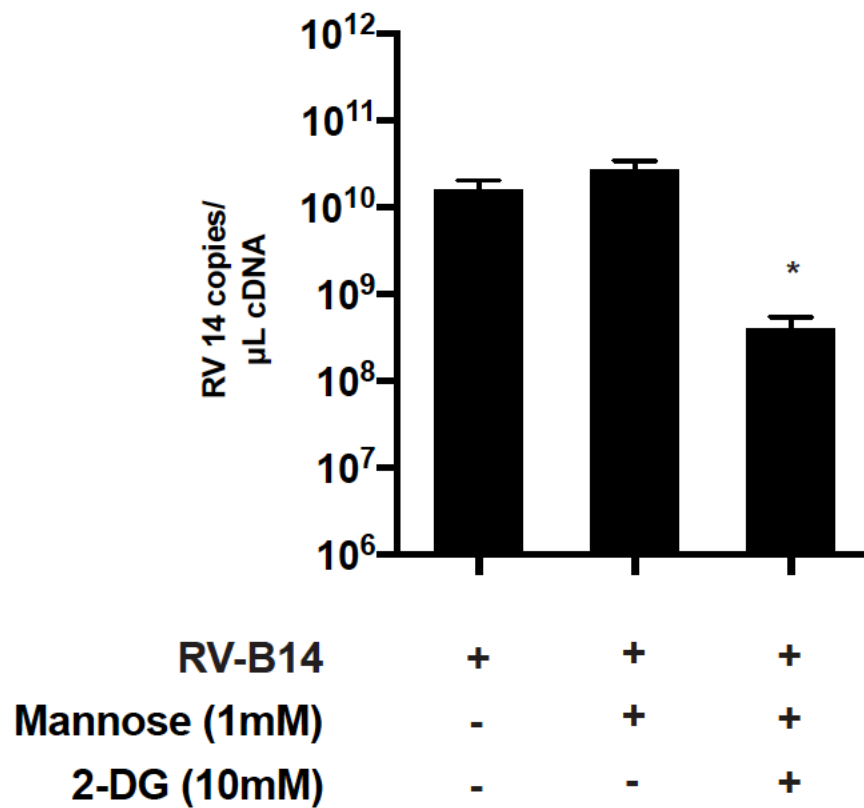

**Fig. S5. Impact of mannose on 2-DG treatment.** HeLa cells were infected as described in the materials and methods section. After 1h of infection, cells were washed and incubated with the indicated compounds for additional 6h prior to analysis.

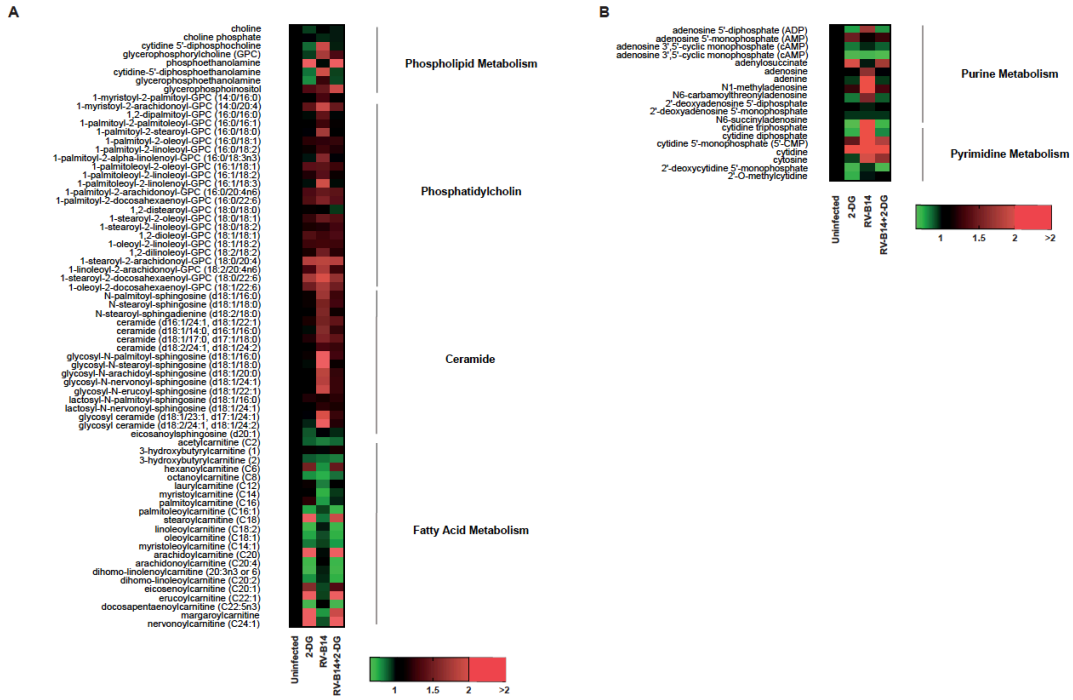

**Fig. S6. Effect of 2-DG on RV-induced metabolic changes.** Metabolomic analysis of HeLa cells infected with RV-B14 (MOI 3.5) and/or 2-DG at 7 h post infection. Panel A) shows the effect on lipid metabolism and Panel B) on nucleotide metabolism.

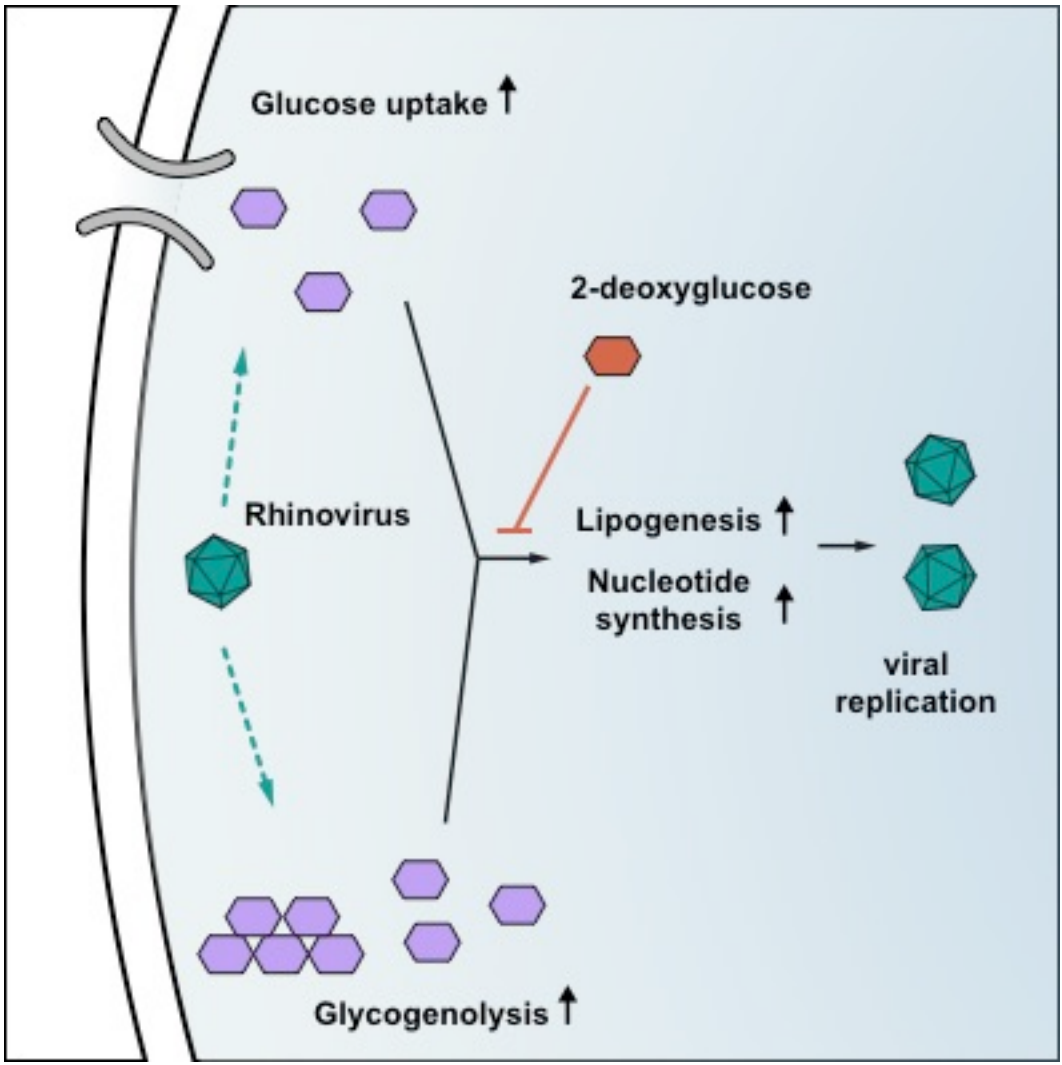

**Fig. S7. Working model of RV-induced metabolic alterations and 2-DG's interruption**



|                |                         |
|----------------|-------------------------|
| GLUT1 F        | GATTGGCTCCTTCTCTGTGG    |
| GLUT1 R        | GTCAGGCCCGCAGTACACAC    |
| GLUT3 F        | ATGGGGACACAGAAGGTCAC    |
| GLUT3 R        | CAGAGAGACGTGAGCAGCAC    |
| HK1 F          | GGACTGGACCGTCTGAATGT    |
| HK1 R          | ACAGTTCCTTCACCGTCTGG    |
| HPRT F (human) | TCAGGCAGTATAATCCAAAGATG |
| HPRT R (human) | AGTCTGGCTTATATCCAACACTT |
| HRV 14 F       | TCCACCTGATCGAAACGTCCA   |
| HRV 14 R       | GGCGCCATATCCAATGGTGT    |
| HPRT F (mouse) | CGTCGTGATTAGCGATGATG    |
| HPRT R (mouse) | ACAGAGGGCCACAATGTGAT    |
| HRV 1B F       | AATTGGCTGCAATGGTTCGC    |
| HRV 1B R       | CGCGGCATTACACATTTTCAG   |

**Table S1. Primer sequences**

## **Dataset S1. Raw data of Metabolomics experiments**
